# Supplementary material for: Gas sensing properties of self-assembled ZnO nanotube bundles
Source: Royal Society of Chemistry journal article supplement (doi:10.1039/c3ra42383b), 2013-01-01
Supplement: c3ra42383b.pdf [file c3ra42383b.pdf]

## Electronic Supplementary Information

### Gas sensing properties of self-assembled ZnO nanotube bundles

**Qingjiang Yu,<sup>\*a</sup> Cuiling Yu,<sup>\*b</sup> Jinzhong Wang,<sup>c</sup> Fengyun Guo,<sup>c</sup> Shiyong Gao,<sup>c</sup> Shujie Jiao,<sup>c</sup> Hongtao Li,<sup>c</sup> Xitian Zhang,<sup>d</sup> Xuanzhang Wang,<sup>d</sup> Hong Gao,<sup>d</sup> Haibin Yang<sup>\*e</sup> and Liancheng Zhao<sup>c</sup>**

<sup>a</sup> Department of Photoelectric Information Science and Engineering, School of Materials Science and Engineering, Harbin Institute of Technology, Harbin, 150001, China; Key Laboratory for Photonic and Electric Bandgap Materials, Ministry of Education, Harbin Normal University, Harbin, 150025, China. Fax: +86 451 86418328; Tel: +86 451 86417763; E-mail: qingjiang.yu@hit.edu.cn

<sup>b</sup> Department of Physics, Harbin Institute of Technology, Harbin, 150001, China. Fax: +86 451 86418328; Tel: +86 451 86417763; E-mail: cuiling.yu@hit.edu.cn

<sup>c</sup> Department of Photoelectric Information Science and Engineering, School of Materials Science and Engineering, Harbin Institute of Technology, Harbin, 150001, China

<sup>d</sup> Key Laboratory for Photonic and Electric Bandgap Materials, Ministry of Education, Harbin Normal University, Harbin, 150025, China

<sup>e</sup> State Key Laboratory of Superhard Materials, Jilin University, Changchun, 130012, China. Fax: +86 431 85168763; Tel: +86 431 85168763; E-mail: yanghb@jlu.edu.cn

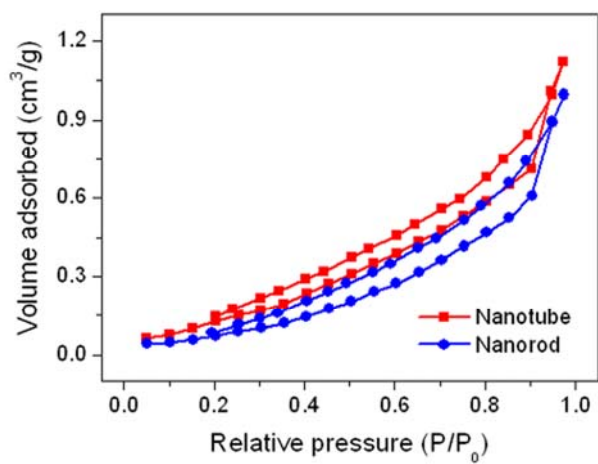

**Fig. S1** N<sub>2</sub> adsorption-desorption isotherms of the ZnO nanotube bundles and ZnO nanorod bundles.
